# Supplementary material for: Source Apportionment of Fine Organic Particulate Matter (PM2.5) in Central Addis Ababa, Ethiopia
Source: MDPI journal article supplement (doi:10.3390/ijerph182111608), 2021-11-04
Supplement: s1 [file s1]

## Supplementary Figures and Tables

## Supplemental Figures

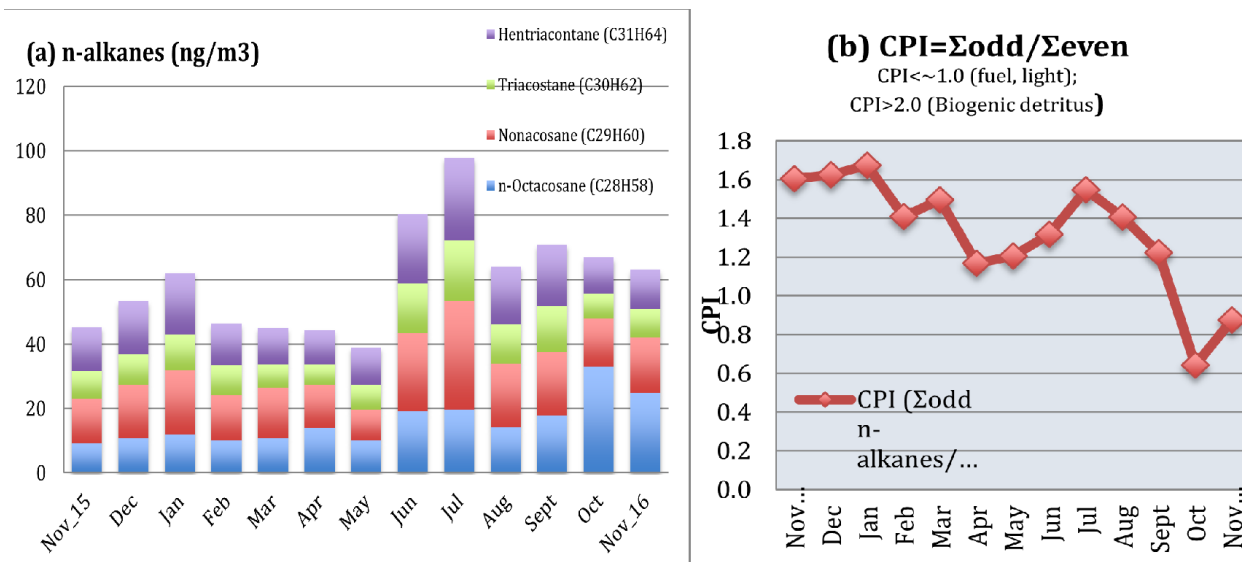

**Figure S1.** n-alkanes (a) Stacked graph of monthly n-alkanes (ngm<sup>-3</sup>), (b) Carbon Preference Index (CPI) (Sum of Odd/Even n-alkanes).

**Table S1.** Summary of previous PM<sub>2.5</sub> and PM<sub>10</sub> source apportionment results carried out on cities in Africa.

| Study site; Study year; Site typology;<br>Mean PM <sub>2.5</sub> , Mean PM <sub>10</sub> | Popula-<br>tion<br>estimate<br>(mill) | Particle<br>size<br>Fraction | Method-ology;<br>sampling sea-<br>son | SEA<br>SALT<br>% | DUST<br>%   | TRAFFIC/<br>Motor<br>Vehicle***<br>% | IN-<br>DUST<br>RIES<br>% | BIOMASS                                 |                                              | Reference *                         |
|------------------------------------------------------------------------------------------|---------------------------------------|------------------------------|---------------------------------------|------------------|-------------|--------------------------------------|--------------------------|-----------------------------------------|----------------------------------------------|-------------------------------------|
|                                                                                          |                                       |                              |                                       |                  |             |                                      |                          | BURN-<br>ING/<br>RESI-<br>DEN-<br>TIAL% | OTHER<br>(unspeci-<br>fied Human<br>origin)% |                                     |
| Accra, Ghana; 2013; urban; 66                                                            | ~1.6                                  | PM <sub>2.5</sub>            | PMF; year                             |                  | 17.0        | 22.5                                 |                          | 50.5                                    | 10.0                                         | Zhou Z; Zhou L; 2013*               |
| Addis Ababa, Ethiopia; 2008; 80                                                          | 2.8                                   | PM <sub>10</sub>             | Reconstructed mass; Dry & Wet months  |                  | 76-95       |                                      |                          |                                         | 5-24                                         | Gebre**, ur-<br>ban/suburb;<br>2010 |
| <b>Addis Ababa, Ethiopia; 2015/2016; urban; 54</b>                                       | ~4.0                                  | <b>PM<sub>2.5</sub></b>      | <b>CMB; year</b>                      |                  | <b>17.4</b> | <b>28.0***</b>                       |                          | <b>18.3</b>                             | <b>36.3</b>                                  | <b>This study</b>                   |
| Cairo, Egypt; 2010/2011; ur-<br>ban; 51                                                  | 9.12                                  | PM <sub>2.5</sub>            | PCA; year                             |                  | 55.7        | 8.9                                  | 18.0                     | 5.7                                     | 11.7                                         | Boman, 2012*                        |
| Cairo, Egypt; 1999/2002; ur-<br>ban; 86                                                  | 9.12                                  | PM <sub>2.5</sub>            | CMB; year                             | 2.0              | 7.0         | 22.0                                 | 13.0                     | 30.0                                    | 26.0                                         | ESMAP Report,<br>2011*              |
| Cairo, Egypt; 1999/2002; ur-<br>ban; 187                                                 | 9.12                                  | PM <sub>10</sub>             | CMB; year                             | 2.0              | 33.0        | 9.0                                  | 11.0                     | 28.0                                    | 17.0                                         | ESMAP Report,<br>2011*              |
| Dar es Salam, Tanzania; 2005/2007; rural; 13                                             | 1.361                                 | PM <sub>10</sub>             | PCA; year                             | 33.8             | 17.2        | 25.8                                 |                          |                                         | 23.2                                         | Mmari, 2013*                        |
| Dar es Salam, Tanzania; 2005/2007; urban; 14                                             | 1.361                                 | PM <sub>10</sub>             | PCA; year                             |                  |             | 63.6                                 |                          |                                         | 36.4                                         | Mmari, 2013*                        |
| Dar es Salam, Tanzania; 2005/2007; urban; 17                                             | 1.361                                 | PM <sub>10</sub>             | PCA; year                             | 29.3             |             | 37.1                                 | 7.1                      | 13.6                                    | 12.9                                         | Mmari, 2013*                        |
| Ikeja, Nigeria; 1989/1991; industrial; 176                                               | 0.313                                 | PM <sub>10</sub>             | CMB; year                             | 27.8             |             | 33.6                                 | 7.4                      |                                         | 31.2                                         | Oluyemi, 2001*                      |
| Ikoyi, Nigeria; 1989/1991; urban; 92                                                     | 5.195                                 | PM <sub>10</sub>             | CMB; year                             | 24.4             |             | 57.6                                 | 4.5                      |                                         | 13.5                                         | Oluyemi, 2001*                      |
| Qalabotjha, South Africa; 1997; urban; 124                                               | ~0.016                                | PM <sub>10</sub>             | CMB; winter                           |                  | 1.0         |                                      | 1.0                      | 75.0                                    | 23.0                                         | ESMAP Report,<br>2011*              |
| Qalabotjha, South Africa; 1997; urban; 113                                               | ~0.016                                | PM <sub>2.5</sub>            | CMB; winter                           |                  | 11.0        |                                      | 2.0                      | 63.0                                    | 24.0                                         | ESMAP Report,<br>2011*              |
| Yaba, Nigeria; 1989/1991; residential; 188                                               | 5.195                                 | PM <sub>10</sub>             | CMB; year                             | 34.2             |             | 39.0                                 | 7.8                      |                                         | 19.0                                         | Oluyemi, 2001*                      |

\* Source: WHO Ambient Air Quality Database, 2018; \*\* Gebre, G. et al., 2010; \*\*\* motor vehicles. CMB: Chemical Mass Balance; PCA: Principal Component Analysis; ESMAP: Energy Sector Management Assistance Program (World Bank).

**Table S2.** a) Organic Carbon (OC) source contribution estimates by concentration (µg OC/m<sup>3</sup>) in Addis Ababa, November 2015 through November 2016.

| Month  | Measured OC | Meas-<br>ured OC unc | R-square | CHI-<br>square | Biomass<br>burning | Biomass<br>burning<br>unc | Vehi-<br>cles | Vehicles<br>unc | Residen-<br>tial coal<br>combus-<br>tion | Residen-<br>tial coal<br>combus-<br>tion unc | Fuel oil | Fuel oil<br>unc | Other<br>OC | Other<br>OC unc |
|--------|-------------|----------------------|----------|----------------|--------------------|---------------------------|---------------|-----------------|------------------------------------------|----------------------------------------------|----------|-----------------|-------------|-----------------|
| Nov 15 | 16.3        | 2.5                  | 0.99     | 0.56           | 4.6                | 0.9                       | 3.8           | 0.4             | 0.80                                     | 0.18                                         | 0.010    | 0.002           | 7.1         | 2.7             |
| Dec    | 17.0        | 3.1                  | 0.99     | 0.62           | 5.4                | 1.1                       | 4.0           | 0.8             | 0.70                                     | 0.21                                         | 0.011    | 0.003           | 6.9         | 3.4             |
| Jan    | 14.4        | 4.6                  | 0.99     | 0.36           | 6.7                | 1.4                       | 3.8           | 0.6             | 0.89                                     | 0.26                                         | 0.008    | 0.001           | 3.0         | 4.8             |
| Feb    | 19.1        | 4.4                  | 0.99     | 0.58           | 4.2                | 0.9                       | 4.8           | 1.2             | 0.79                                     | 0.19                                         | 0.016    | 0.002           | 9.4         | 4.6             |
| Mar    | 15.5        | 2.1                  | 0.98     | 1.57           | 4.6                | 0.9                       | 4.2           | 0.6             | 0.75                                     | 0.18                                         | 0.011    | 0.003           | 5.9         | 2.4             |
| Apr    | 13.7        | 3.3                  | 0.98     | 1.39           | 4.5                | 0.9                       | 3.7           | 0.5             | 0.66                                     | 0.17                                         | 0.009    | 0.002           | 4.9         | 3.5             |
| May    | 11.1        | 0.9                  | 0.99     | 1.22           | 5.4                | 1.1                       | 4.8           | 0.7             | 0.53                                     | 0.16                                         | 0.009    | 0.002           | 0.3         | 1.6             |
| Jun    | 24.1        | 1.4                  | 0.99     | 0.56           | 14.2               | 2.9                       | 10.5          | 1.0             | 0.97                                     | 0.28                                         | 0.020    | 0.002           | -1.6        | 3.3             |
| Jul    | 25.9        | 5.0                  | 0.99     | 0.89           | 16.1               | 3.2                       | 9.8           | 1.0             | 1.61                                     | 0.34                                         | 0.013    | 0.003           | -1.7        | 6.0             |
| Aug    | 19.0        | 3.9                  | 0.98     | 1.55           | 10.1               | 2.0                       | 9.0           | 1.5             | 0.68                                     | 0.18                                         | 0.009    | 0.002           | -0.8        | 4.6             |
| Sep    | 22.3        | 4.2                  | 0.99     | 1.09           | 11.3               | 2.3                       | 9.7           | 1.3             | 0.89                                     | 0.20                                         | 0.013    | 0.002           | 0.4         | 4.9             |
| Oct    | 10.2        | 1.2                  | 0.99     | 0.61           | 5.6                | 1.1                       | 5.7           | 0.7             | 0.28                                     | 0.11                                         | 0.012    | 0.002           | -1.4        | 1.8             |
| Nov 16 | 11.9        | 1.6                  | 0.99     | 0.49           | 8.8                | 1.8                       | 6.5           | 1.0             | 0.83                                     | 0.19                                         | 0.010    | 0.002           | -4.2        | 2.5             |

Units: micrograms of organic carbon per cubic meter (µg OC/m<sup>3</sup>)

Blue italic text indicates non-significant values (criteria: concentration is less than 2\*uncertainty)

**Table S2.** b) Organic Carbon (OC) source contribution estimates by percentage (%) in Addis Ababa, November 2015 through November 2016.

| Month  | Biomass<br>burning | Biomass<br>burning<br>unc | Vehicles | Vehicles<br>unc | Residen-<br>tial coal<br>combus-<br>tion | Residen-<br>tial coal<br>combus-<br>tion unc | Fuel oil | Fuel oil unc | Other OC | Other OC unc |
|--------|--------------------|---------------------------|----------|-----------------|------------------------------------------|----------------------------------------------|----------|--------------|----------|--------------|
| Nov 15 | 28%                | 7%                        | 23%      | 4%              | 4.9%                                     | 1.4%                                         | 0.06%    | 0.02%        | 44%      | 18%          |
| Dec    | 32%                | 9%                        | 23%      | 6%              | 4.1%                                     | 1.4%                                         | 0.07%    | 0.02%        |          |              |
| Jan    | 47%                | 18%                       | 27%      | 9%              | 6.2%                                     | 2.6%                                         | 0.05%    | 0.02%        |          |              |
| Feb    | 22%                | 7%                        | 25%      | 9%              | 4.1%                                     | 1.4%                                         | 0.08%    | 0.02%        | 49%      | 27%          |
| Mar    | 30%                | 7%                        | 27%      | 5%              | 4.9%                                     | 1.3%                                         | 0.07%    | 0.02%        | 38%      | 16%          |
| Apr    | 32%                | 10%                       | 27%      | 8%              | 4.8%                                     | 1.7%                                         | 0.06%    | 0.02%        |          |              |
| May    | 49%                | 11%                       | 44%      | 7%              | 4.8%                                     | 1.5%                                         | 0.08%    | 0.02%        |          |              |
| Jun    | 59%                | 12%                       | 44%      | 5%              | 4.0%                                     | 1.2%                                         | 0.08%    | 0.01%        |          |              |
| Jul    | 62%                | 17%                       | 38%      | 8%              | 6.2%                                     | 1.8%                                         | 0.05%    | 0.02%        |          |              |
| Aug    | 53%                | 15%                       | 47%      | 12%             | 3.6%                                     | 1.2%                                         | 0.05%    | 0.01%        |          |              |
| Sep    | 51%                | 14%                       | 44%      | 10%             | 4.0%                                     | 1.2%                                         | 0.06%    | 0.01%        |          |              |
| Oct    | 55%                | 13%                       | 56%      | 9%              | 2.8%                                     | 1.1%                                         | 0.12%    | 0.02%        |          |              |
| Nov 16 | 74%                | 18%                       | 54%      | 11%             | 7.0%                                     | 1.8%                                         | 0.09%    | 0.02%        |          |              |

Units: percent of total measured **organic carbon** (% OC)

**Table S3.** CMB Source Contribution of Fine Particulate Matter estimates of Organic Carbon (OC) and ions (Sulfate, Nitrate and Ammonium) by concentration ( $\mu\text{g OC}/\text{m}^3$ ) in Addis Ababa, November 2015 through November 2016.

| Month  | PM mass | massunc | Sulfate | Sulfate std err | Nitrate | Nitrate std err | Ammonium | Ammonium std err | Dust  | Dust unc | Bio-mass burning | Bbunc | Vehicles | vehunc | Residential coal combustion | coalunc | Fuel oil | fuel oil unc | Other PM | otherunc |
|--------|---------|---------|---------|-----------------|---------|-----------------|----------|------------------|-------|----------|------------------|-------|----------|--------|-----------------------------|---------|----------|--------------|----------|----------|
| Nov-15 | 39.92   | 7.71    | 2.59    | 0.13            | 0.32    | 0.04            | 0.64     | 0.10             | 5.02  | 1.23     | 5.47             | 1.11  | 8.52     | 1.15   | 1.86                        | 0.43    | 0.26     | 0.06         | 15.24    | 7.98     |
| Dec-15 | 40.58   | 16.56   | 3.27    | 0.77            | 0.38    | 0.09            | 0.69     | 0.08             | 8.79  | 2.82     | 6.45             | 1.32  | 8.92     | 2.04   | 1.62                        | 0.48    | 0.30     | 0.07         | 10.15    | 17.00    |
| Jan-16 | 45.37   | 37.39   | 3.24    | 0.68            | 0.36    | 0.01            | 0.91     | 0.13             | 6.87  | 3.14     | 8.01             | 1.63  | 8.29     | 1.61   | 2.06                        | 0.59    | 0.21     | 0.03         | 15.43    | 37.61    |
| Feb-16 | 41.23   | 7.98    | 3.63    | 0.86            | 0.32    | 0.01            | 0.76     | 0.17             | 11.01 | 1.45     | 4.99             | 1.02  | 11.01    | 3.14   | 1.82                        | 0.44    | 0.43     | 0.06         | 7.25     | 8.82     |
| Mar-16 | 40.89   | 9.13    | 2.23    | 0.24            | 0.19    | 0.07            | 0.70     | 0.27             | 11.39 | 1.42     | 5.53             | 1.12  | 9.53     | 1.67   | 1.74                        | 0.41    | 0.29     | 0.07         | 9.28     | 9.47     |
| Apr-16 | 33.64   | 11.14   | 1.34    | 0.33            | 0.34    | 0.04            | 0.58     | 0.08             | 4.25  | 0.83     | 5.34             | 1.08  | 8.21     | 1.40   | 1.53                        | 0.39    | 0.23     | 0.06         | 11.82    | 11.32    |
| May-16 | 35.35   | 12.99   | 1.74    | 0.35            | 0.39    | 0.04            | 0.46     | 0.15             | 13.24 | 5.08     | 6.46             | 1.31  | 11.17    | 1.92   | 1.22                        | 0.38    | 0.24     | 0.05         | 0.43     | 14.15    |
| Jun-16 | 83.74   | 6.83    | 3.99    | 0.70            | 0.20    | 0.05            | 1.18     | 0.09             | 16.75 | 2.39     | 17.02            | 3.43  | 24.07    | 2.70   | 2.24                        | 0.65    | 0.53     | 0.06         | 17.77    | 8.50     |
| Jul-16 | 70.13   | 17.80   | 2.89    | 0.41            | 0.26    | 0.09            | 1.25     | 0.22             | 6.58  | 1.32     | 19.32            | 3.88  | 22.03    | 2.70   | 3.72                        | 0.78    | 0.35     | 0.09         | 13.73    | 18.49    |
| Aug-16 | 74.86   | 18.57   | 2.74    | 0.67            | 0.15    | 0.03            | 1.11     | 0.24             | 3.83  | 1.23     | 12.12            | 2.43  | 20.55    | 3.81   | 1.58                        | 0.41    | 0.23     | 0.06         | 32.56    | 19.17    |
| Sep-16 | 61.11   | 13.01   | 4.61    | 0.41            | 0.20    | 0.06            | 2.32     | 0.14             | 5.88  | 1.22     | 13.55            | 2.72  | 22.48    | 3.36   | 2.06                        | 0.46    | 0.34     | 0.06         | 9.67     | 13.77    |
| Oct-16 | 36.71   | 8.56    | 4.12    | 0.46            | 0.07    | 0.02            | 1.55     | 0.23             | 6.07  | 1.09     | 6.68             | 1.35  | 12.86    | 1.81   | 0.66                        | 0.25    | 0.31     | 0.06         | 4.38     | 8.94     |
| Nov-16 | 39.49   | 7.56    | 3.38    | 0.34            | 0.05    | 0.03            | 0.69     | 0.17             | 4.33  | 0.42     | 10.49            | 2.11  | 14.61    | 2.59   | 1.93                        | 0.43    | 0.27     | 0.04         | 3.74     | 8.29     |

Units: micrograms of fine particulate matter per cubic meter ( $\mu\text{g PM}_{2.5}/\text{m}^3$ )Blue italic text indicates non-significant values (criteria: concentration is less than  $2 \times$  uncertainty)**Table S4.** CMB Source Contribution of Fine Particulate Matter estimates of Organic Carbon (OC) and ions (Sulfate, Nitrate and Ammonium) by percent (%) in Addis Ababa, November 2015 through November 2016.

| Month  | Sulfate | Sulfate std err | Nitrate | Nitrate std err | Ammonium | Ammonium std err | Dust  | Dust unc | Bio-mass burning | bbunc | Vehicles | vehunc | Residential coal combustion | Coal unc | Fuel oil | fuel oil unc | Other PM | otherunc |
|--------|---------|-----------------|---------|-----------------|----------|------------------|-------|----------|------------------|-------|----------|--------|-----------------------------|----------|----------|--------------|----------|----------|
| Nov 15 | 6.5%    | 1.3%            | 0.8%    | 0.2%            | 1.6%     | 0.4%             | 13%   | 4%       | 14%              | 4%    | 21%      | 5%     | 4.7%                        | 1.4%     | 0.6%     | 0.2%         | 38%      | 21%      |
| Dec    | 8.0%    | 3.8%            | 0.9%    | 0.4%            | 1.7%     | 0.7%             | 22%   | 11%      | 16%              | 7%    | 22%      | 10%    | 4.0%                        | 2.0%     | 0.7%     | 0.4%         | 25%      | 43%      |
| Jan    | 7.1%    | 6.1%            | 0.8%    | 0.6%            | 2.0%     | 1.7%             | 15%   | 14%      | 18%              | 15%   | 18%      | 15%    | 4.5%                        | 4.0%     | 0.5%     | 0.4%         | 34%      | 87%      |
| Feb    | 8.8%    | 2.7%            | 0.8%    | 0.2%            | 1.8%     | 0.6%             | 27%   | 6%       | 12%              | 3%    | 27%      | 9%     | 4.4%                        | 1.4%     | 1.0%     | 0.3%         | 18%      | 22%      |
| Mar    | 5.5%    | 1.4%            | 0.5%    | 0.2%            | 1.7%     | 0.8%             | 28%   | 7%       | 14%              | 4%    | 23%      | 7%     | 4.3%                        | 1.4%     | 0.7%     | 0.2%         | 23%      | 24%      |
| Apr    | 4.0%    | 1.6%            | 1.0%    | 0.4%            | 1.7%     | 0.6%             | 13%   | 5%       | 16%              | 6%    | 24%      | 9%     | 4.5%                        | 1.9%     | 0.7%     | 0.3%         | 35%      | 36%      |
| May    | 4.9%    | 2.1%            | 1.1%    | 0.4%            | 1.3%     | 0.6%             | 37%   | 20%      | 18%              | 8%    | 32%      | 13%    | 3.5%                        | 1.7%     | 0.7%     | 0.3%         | 1%       | 40%      |
| Jun    | 4.8%    | 0.9%            | 0.2%    | 0.1%            | 1.4%     | 0.2%             | 20%   | 3%       | 20%              | 4%    | 29%      | 4%     | 2.7%                        | 0.8%     | 0.6%     | 0.1%         | 21%      | 10%      |
| Jul    | 4.1%    | 1.2%            | 0.4%    | 0.2%            | 1.8%     | 0.6%             | 9%    | 3%       | 28%              | 9%    | 31%      | 9%     | 5.3%                        | 1.7%     | 0.5%     | 0.2%         | 20%      | 27%      |
| Aug    | 3.7%    | 1.3%            | 0.2%    | 0.1%            | 1.5%     | 0.5%             | 5%    | 2%       | 16%              | 5%    | 27%      | 8%     | 2.1%                        | 0.8%     | 0.3%     | 0.1%         | 43%      | 28%      |
| Sep    | 7.5%    | 1.7%            | 0.3%    | 0.1%            | 3.8%     | 0.8%             | 10%   | 3%       | 22%              | 6%    | 37%      | 10%    | 3.4%                        | 1.0%     | 0.6%     | 0.2%         | 16%      | 23%      |
| Oct    | 11.2%   | 2.9%            | 0.2%    | 0.1%            | 4.2%     | 1.2%             | 17%   | 5%       | 18%              | 6%    | 35%      | 10%    | 1.8%                        | 0.8%     | 0.9%     | 0.2%         | 12%      | 25%      |
| Nov 16 | 8.6%    | 1.8%            | 0.1%    | 0.1%            | 1.8%     | 0.5%             | 11%   | 2%       | 27%              | 7%    | 37%      | 10%    | 4.9%                        | 1.4%     | 0.7%     | 0.2%         | 9%       | 21%      |
| Avg    | 6.5%    | 2.2%            | 0.6%    | 0.2%            | 2.0%     | 0.7%             | 17.4% | 6.6%     | 18.3%            | 6.6%  | 28.0%    | 9.1%   | 3.8%                        | 1.6%     | 0.7%     | 0.2%         | 22.7%    | 31.2%    |
| Min    | 3.7%    | 0.9%            | 0.1%    | 0.1%            | 1.3%     | 0.2%             | 5.1%  | 2.1%     | 12.1%            | 3.4%  | 18.3%    | 4.0%   | 1.8%                        | 0.8%     | 0.3%     | 0.1%         | 1.2%     | 10.3%    |
| Max    | 11.2%   | 6.1%            | 1.1%    | 0.6%            | 4.2%     | 1.7%             | 37.5% | 19.9%    | 27.5%            | 15.0% | 37.0%    | 15.5%  | 5.3%                        | 4.0%     | 1.0%     | 0.4%         | 43.5%    | 87.5%    |

Units: percent of total measured particulate matter (%  $\text{PM}_{2.5}$ )Blue italic text indicates non-significant values (criteria: concentration is less than  $2 \times$  uncertainty)
